# Supplementary material
Source: PubMed Central journal article supplement (PMC3270979)
Supplement: supp_M111.273953_jbc.M111.273953-2.pdf [file supp_M111.273953_jbc.M111.273953-2.pdf]

Yeast Strains used in Fuchs et al.

| Strain | Alias             | genotype                                                                                                           | isogenic WT | plasmid | Reference  | Used    |
|--------|-------------------|--------------------------------------------------------------------------------------------------------------------|-------------|---------|------------|---------|
| BY4741 |                   | MATa <i>his3Δ1 leu2Δ0 met15Δ0 ura3Δ0</i>                                                                           |             |         | 1          | Fig 1   |
| YMS196 | YMS196            | Mat* <i>ura3Δ0 leu2Δ0 met15Δ0 LYS2+ can1Δ::STE2pr-spHIS5 lyp1Δ::STE3pr-LEU2 cyh2</i>                               | WT          |         | 2          | Fig 4   |
| YKK26  | SET2-Flag         | Mat* <i>ura3Δ0 leu2Δ0 met15Δ0 LYS2 can1Δ::STE2pr-spHIS5 lyp1Δ::STE3pr-LEU2 cyh2 set2Δ::SET2-Flag:NATMX</i>         | YMS196      |         | this study | Fig 1,4 |
| YKK27  | SET2 1-618-Flag   | Mat* <i>ura3Δ0 leu2Δ0 met15Δ0 LYS2 can1Δ::STE2pr-spHIS5 lyp1Δ::STE3pr-LEU2 cyh2 set2Δ::SET2-(1-618)-Flag:NATMX</i> | YMS196      |         | this study | Fig 1,4 |
| YKK28  | SET2 (1-261)-Flag | Mat* <i>ura3Δ0 leu2Δ0 met15Δ0 LYS2 can1Δ::STE2pr-spHIS5 lyp1Δ::STE3pr-LEU2 cyh2 set2Δ::SET2-(1-261)-Flag:NATMX</i> | YMS196      |         | this study | Fig 1,4 |
| sub62  | sub62             | Mata <i>leu2 ura3 his3 trp1</i>                                                                                    |             |         | -3         | Fig 2   |
| MHY754 | <i>cim3-1</i>     | MATa <i>his3-Δ200 leu2Δ1 ura3-52 lys2-801 trp1Δ63 ade2-101 cim3-1</i>                                              | Sub62       |         | -3         | Fig 2   |

|         |               |                                                                                                                                                     |        |                                          |            |       |
|---------|---------------|-----------------------------------------------------------------------------------------------------------------------------------------------------|--------|------------------------------------------|------------|-------|
| KFY246  | KFY246        | Mata <i>ura3-52 leu2Δ1 trp1Δ63 his3Δ200 lys2Δ202 ctk1::HIS3::TRP1</i>                                                                               |        | pRS316-CTK1                              | this study | Fig 3 |
| YJJ662  | YJJ662        | Mata <i>ura3-52 leu2Δ1 his3Δ200</i>                                                                                                                 | WT     |                                          | 4          | Fig 3 |
| YJJ577  | <i>paf1Δ</i>  | Mat* <i>ura3-52 leu2Δ1 his3Δ200 paf1Δ::HIS3</i>                                                                                                     | YJJ662 |                                          | 4          | Fig 3 |
| YJJ665  | <i>cdc73Δ</i> | Mata <i>ura3-52 leu2Δ1 his3Δ200 cdc73Δ::HIS3</i>                                                                                                    | YJJ662 |                                          | 4          | Fig 3 |
| YJJ1303 | <i>rtf1Δ</i>  | Mata <i>ura3-52 leu2Δ1 his3Δ200 rtf1Δ::KANMX</i>                                                                                                    | YJJ662 |                                          | 5          | Fig 3 |
| YJJ1336 | <i>leo1Δ</i>  | Mata <i>ura3-52 leu2Δ1 his3Δ200 leo1Δ::KANMX</i>                                                                                                    | YJJ662 |                                          | 5          | Fig 3 |
| YJJ1197 | <i>ctr9Δ</i>  | Mata <i>ura3-52 leu2Δ1 his3Δ200 ctr9Δ::KANMX</i>                                                                                                    | YJJ662 |                                          | 5          | Fig 3 |
| YSF076  | <i>set2Δ</i>  | Mata <i>ura3-52 leu2Δ1 his3Δ200 set2Δ::KANMX</i>                                                                                                    | YJJ662 |                                          | this study | Fig 3 |
| YSB1267 | <i>bur2Δ</i>  | MATα, <i>bur2Δ::TRP1, ura3-52, leu2Δ1, trp1Δ63, his4-912δ, lys2-128δ, suc2ΔUAS</i> (pRS316- Bur2)                                                   |        | pRS316-BUR2                              | 6          | Fig 4 |
| YSF186  | <i>bur2Δ</i>  | Mat*, <i>ura3-52 or ura3Δ0, leu2Δ1 or leu2Δ0, his3Δ1 or HIS3, trp1Δ63 or TRP1, lys2-128 or LYS2, met15Δ0 or MET15 bur2Δ::TRP1 set2Δ::KanMX::NAT</i> |        | pRS316-BUR2 (URA3 CEN/ARS, fl+ori, AmpR) | this study | Fig 4 |

|                           |                           |                                                                                                                                                                                                                                          |         |                                          |            |        |
|---------------------------|---------------------------|------------------------------------------------------------------------------------------------------------------------------------------------------------------------------------------------------------------------------------------|---------|------------------------------------------|------------|--------|
|                           | <i>set2Δ</i>              |                                                                                                                                                                                                                                          |         |                                          |            |        |
| YSF190                    | <i>bur2Δ</i>              | Mat*, <i>ura3-52</i> or <i>ura3Δ0</i> , <i>leu2Δ1</i> or <i>leu2Δ0</i> , <i>his3Δ1</i> or HIS3, <i>trp1Δ63</i> or TRP1, <i>lys2-128</i> or LYS2, <i>met15Δ0</i> or MET15 <i>bur2Δ::TRP1</i> <i>set2Δ::KANMX::NAT</i> <i>rco1Δ::KANMX</i> |         | pRS316-BUR2 (URA3 CEN/ARS, fl+ori, AmpR) | this study | Fig 4  |
|                           | <i>set2Δ</i>              |                                                                                                                                                                                                                                          |         |                                          |            |        |
|                           | <i>rco1Δ</i>              |                                                                                                                                                                                                                                          |         |                                          |            |        |
| yeast deletion collection | yeast deletion collection | MATa <i>his3Δ1 leu2Δ0 met15Δ0 ura3Δ0 xxxΔ::KANMX</i>                                                                                                                                                                                     | BY4741  |                                          | 7          | Fig 4  |
| <i>swr1Δ</i>              | <i>swr1Δ</i>              | MATa <i>his3Δ1 leu2Δ0 met15Δ0 ura3Δ0 swr1Δ::KANMX</i>                                                                                                                                                                                    | BY4741  |                                          | 7          | Fig 4  |
| <i>htz1Δ</i>              |                           | MATa <i>his3Δ1 leu2Δ0 met15Δ0 ura3Δ0 htz1Δ::KANMX</i>                                                                                                                                                                                    | BY4741  |                                          | 7          | Fig 4  |
| GF262-2                   | GF262-2                   | Mata <i>ura3 leu2 trp1 his3</i>                                                                                                                                                                                                          |         |                                          | 8          | Fig S1 |
| JGV4                      | JGV4                      | Mata <i>ura3 leu2 trp1 his3 kin28-t3</i>                                                                                                                                                                                                 | GF262-2 |                                          | 8          | Fig S1 |
| YMK18                     | FCP1                      | mat* <i>fcp1Δ::LEU can1-100 his3-11,15 leu2-3,112 trp1-1, ura3 ade2-1</i> LYS2                                                                                                                                                           | W303    | pRS316 (FCP1-URA3)                       | 9          | Fig S1 |
| YMK20                     | <i>fcp1-1</i>             | mat* <i>fcp1Δ::LEU can1-100 his3-11,15 leu2-3,112 trp1-1, ura3 ade2-1</i> LYS2                                                                                                                                                           | W303    | pRS316 ( <i>fcp1-1</i> -URA3)            | 9          | Fig S1 |
| H-51                      |                           | Mata <i>ura3-52 leu2-3,112 his3Δ200</i>                                                                                                                                                                                                  | WT      |                                          | 10         | Fig S1 |
| YMH650                    | <i>ssu72-2</i>            | Mata <i>ura3-52 leu2-3,112 his3Δ200 ssu72-2</i>                                                                                                                                                                                          | H-51    |                                          | 10         | Fig S1 |

|                      |                          |                                                                                               |                |  |            |        |
|----------------------|--------------------------|-----------------------------------------------------------------------------------------------|----------------|--|------------|--------|
| yeast TAP collection | yeast TAP collection     | MATa <i>his3Δ1 leu2Δ0 met15Δ0 ura3Δ0</i><br>XXX-TAP:HIS3                                      | BY4741         |  |            | Fig S2 |
| YSF100               |                          | Mata <i>ura3-52 leu2Δ1 trp1Δ63 his3Δ200 lys2Δ202 ctk1::his3::TRP1 set2Δ::KANMX</i>            | Y9230 (Ref 11) |  | this study | Fig S2 |
| YSF113               | <i>ctk1Δ</i> / FCP1-TAP  | Mata <i>ura3Δ0 met15Δ0 leu2Δ0 his3Δ1 can1Δ::STE2-pr-URA3 lyp1Δ ctk1Δ::KAN FCP1-TAP::HIS3</i>  |                |  | this study | Fig S2 |
| YSF114               | <i>ctk1Δ</i> / HRR25-TAP | Mata <i>ura3Δ0 met15Δ0 leu2Δ0 his3Δ1 can1Δ::STE2-pr-URA3 lyp1Δ ctk1Δ::KAN HRR25-TAP::HIS3</i> |                |  | this study | Fig S2 |
| YSF115               | <i>ctk1Δ</i> / PCF11-TAP | Mata <i>ura3Δ0 met15Δ0 leu2Δ0 his3Δ1 can1Δ::STE2-pr-URA3 lyp1Δ ctk1Δ::KAN PCF11-TAP::HIS3</i> |                |  | this study | Fig S2 |
| YSF116               | <i>ctk1Δ</i> / SET2-TAP  | Mata <i>ura3Δ0 met15Δ0 leu2Δ0 his3Δ1 can1Δ::STE2-pr-URA3 lyp1Δ ctk1Δ::KAN SET2-TAP::HIS3</i>  |                |  | this study | Fig S2 |

1. Brachmann, C. B., Davies, A., Cost, G. J., Caputo, E., Li, J., Hieter, P., and Boeke, J. D. (1998) *Yeast* **14**, 115-132
2. Schuldiner, M., Collins, S. R., Weissman, J. S., and Krogan, N. J. (2006) *Methods* **40**, 344-352
3. Ghislain, M., Udvardy, A., and Mann, C. (1993) *Nature* **366**, 358-362
4. Shi, X., Chang, M., Wolf, A. J., Chang, C. H., Frazer-Abel, A. A., Wade, P. A., Burton, Z. F., and Jaehning, J. A. (1997) *Mol Cell Biol* **17**, 1160-1169

5. Nordick, K., Hoffman, M. G., Betz, J. L., and Jaehning, J. A. (2008) *Eukaryot Cell* **7**, 1158-1167
6. Keogh, M. C., Kurdistani, S. K., Morris, S. A., Ahn, S. H., Podolny, V., Collins, S. R., Schuldiner, M., Chin, K., Punna, T., Thompson, N. J., Boone, C., Emili, A., Weissman, J. S., Hughes, T. R., Strahl, B. D., Grunstein, M., Greenblatt, J. F., Buratowski, S., and Krogan, N. J. (2005) *Cell* **123**, 593-605
7. Winzeler, E. A., Shoemaker, D. D., Astromoff, A., Liang, H., Anderson, K., Andre, B., Bangham, R., Benito, R., Boeke, J. D., Bussey, H., Chu, A. M., Connelly, C., Davis, K., Dietrich, F., Dow, S. W., El Bakkoury, M., Foury, F., Friend, S. H., Gentalen, E., Giaever, G., Hegemann, J. H., Jones, T., Laub, M., Liao, H., Liebundguth, N., Lockhart, D. J., Lucau-Danila, A., Lussier, M., M'Rabet, N., Menard, P., Mittmann, M., Pai, C., Rebischung, C., Revuelta, J. L., Riles, L., Roberts, C. J., Ross-MacDonald, P., Scherens, B., Snyder, M., Sookhai-Mahadeo, S., Storms, R. K., Veronneau, S., Voet, M., Volckaert, G., Ward, T. R., Wysocki, R., Yen, G. S., Yu, K., Zimmermann, K., Philippsen, P., Johnston, M., and Davis, R. W. (1999) *Science* **285**, 901-906
8. Valay, J. G., Simon, M., Dubois, M. F., Bensaude, O., Facca, C., and Faye, G. (1995) *J Mol Biol* **249**, 535-544
9. Kobor, M. S., Archambault, J., Lester, W., Holstege, F. C., Gileadi, O., Jansma, D. B., Jennings, E. G., Kouyoumdjian, F., Davidson, A. R., Young, R. A., and Greenblatt, J. (1999) *Mol Cell* **4**, 55-62
10. Pappas, D. L., Jr., and Hampsey, M. (2000) *Mol Cell Biol* **20**, 8343-8351
11. Tong, A. H., and Boone, C. (2007) High-Throughput Strain Construction and Systematic Synthetic Lethal Screening in *Saccharomyces cerevisiae*. in *Methods in Micro.* pp 1-19
