# Supplementary material
Source: PubMed Central journal article supplement (PMC3270979)

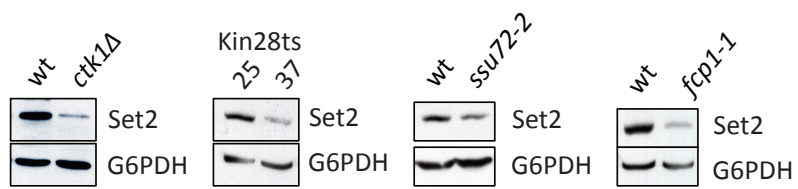

Figure S1

Supplement: supp_M111.273953_jbc.M111.273953-3.pdf [file supp_M111.273953_jbc.M111.273953-3.pdf]

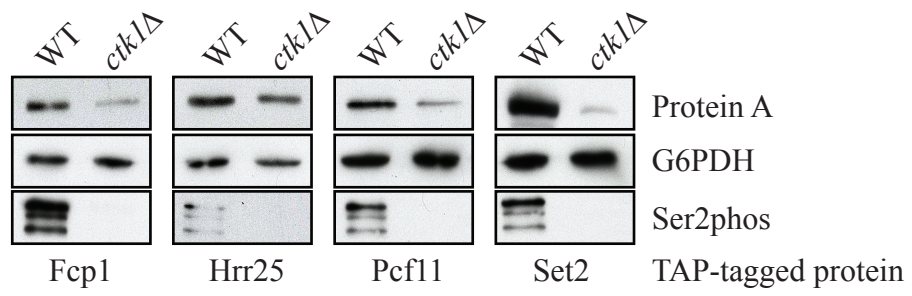

Figure S2

Supplement: supp_M111.273953_jbc.M111.273953-4.pdf [file supp_M111.273953_jbc.M111.273953-4.pdf]
